# Supplementary material for: One-pot synthesis of hierarchical SnO2 hollow nanospindles self-assembled from nanorods and their lithium storage properties
Source: Royal Society of Chemistry journal article supplement (doi:10.1039/c4ra11243a), 2014-12-02
Supplement: c4ra11243a1.pdf [file c4ra11243a1.pdf]

## Supplementary Information for

# One-pot synthesis of hierarchical SnO<sub>2</sub> hollow nanospindles self-assembled from nanorods and their lithium storage properties

**Qingjiang Yu,<sup>\*ab</sup> Wenqi Wang,<sup>a</sup> Huixin Wang,<sup>c</sup> Yewu Huang,<sup>a</sup> Jinzhong Wang,<sup>\*a</sup> Shiyong Gao,<sup>\*a</sup> Fengyun Guo,<sup>a</sup> Xitian Zhang,<sup>b</sup> Hong Gao,<sup>b</sup> Xuanzhang Wang<sup>b</sup> and Cuiling Yu<sup>\*d</sup>**

<sup>a</sup>Department of Optoelectric Information Science, School of Materials Science and Engineering, Harbin Institute of Technology, Harbin, 150001, China. Fax: +86 451 86418328; Tel: +86 451 86417763; E-mail: qingjiang.yu@hit.edu.cn; jinzhong\_wang@hit.edu.cn; gaoshiyong@hit.edu.cn

<sup>b</sup>Key Laboratory for Photonic and Electric Bandgap Materials, Ministry of Education, Harbin Normal University, Harbin, 150025, China

<sup>c</sup>Department of Material Physics and Chemistry, School of Materials Science and Engineering, Harbin Institute of Technology, Harbin, 150001, China

<sup>d</sup>Department of Physics, Harbin Institute of Technology, Harbin, 150001, China. E-mail: cuiling.yu@hit.edu.cn

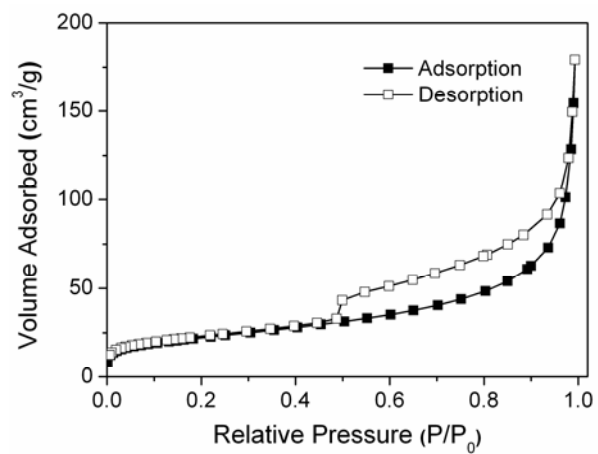

**Fig. S1** N<sub>2</sub> adsorption–desorption isotherms of SnO<sub>2</sub> hollow nanospindles.
